# Supplementary material for: Spectrum of Germline Pathogenic Variants in BRCA1/2 Genes in the Apulian Southern Italy Population: Geographic Distribution and Evidence for Targeted Genetic Testing
Source: MDPI journal article supplement (doi:10.3390/cancers13184714), 2021-09-21
Supplement: s1 [file s1]

## Article

# Spectrum of Germline Pathogenic Variants in BRCA1/2 Genes in the Apulian Southern Italy Population: Geographic Distribution and Evidence for Targeted Genetic Testing

Margherita Patruno <sup>1,\*</sup>, Simona De Summa <sup>2,\*</sup>, Nicoletta Resta <sup>3</sup>, Mariapia Caputo <sup>2</sup>, Silvia Costanzo <sup>1</sup>, Maria Digennaro <sup>1</sup>, Brunella Pilato <sup>2</sup>, Rosanna Bagnulo <sup>3</sup>, Antonino Pantaleo <sup>3</sup>, Cristiano Simone <sup>3,4</sup>, Maria Iole Natalicchio <sup>5</sup>, Elisabetta De Matteis <sup>6</sup>, Paolo Tarantino <sup>7</sup>, Stefania Tommasi <sup>2</sup> and Angelo Paradiso <sup>1</sup>

## Supplementary materials:

**Table S1.** List of VUS identified in the analyzed cohort.

| BRCA1               | BRCA2          |
|---------------------|----------------|
| p.Pro1776Ser        | p.Asp2566Glu   |
| p.Arg1347Gly        | p.Glu1811Ala   |
| p.Arg1528Thr        | p.Ile1298Thr   |
| p.Asn1354Ser        | p.Alala1170Val |
| p.Asp1152Asn        | p.Alala1797Gly |
| p.Asp1435Gly        | p.Alala1991Val |
| p.Asp67Tyr          | p.Alala2351Thr |
| p.Asp96Gly          | p.Alala3205Leu |
| p.Cys636Tyr         | p.Arg155Thr    |
| p.Gln1090Arg        | p.Arg174His    |
| p.Gln284Arg         | p.Arg2108Cys   |
| p.Gln284Arg         | p.Arg2520Pro   |
| p.Glu445Gln         | p.Arg2787His   |
| p.Glu761Gln         | p.Arg3385His   |
| p.Gly1201Cys        | p.Asn1836Lys   |
| p.His888Tyr         | p.Asn1906ser   |
| p.Ile1275Val        | p.Asp125Glu    |
| p.Lys970Asn         | p.Asp191Asp    |
| p.Pro1771Arg        | p.Asp3112Asn   |
| p.Pro568Leu         | p.Asp3112Asn   |
| p.Pro659Ala         | p.Cys148Arg    |
| p.Ser632Asn         | p.Glu1110Gly   |
| p.Ser784Leu         | p.Glu1901Val   |
| p.Thr333Ala         | p.Glu2292Gly   |
| p.Thr779Ala         | p.Glu2961Ser   |
| p.Val1378Ile        | p.Glu2981Lys   |
| p.Val1653Met        | p.Glu3002asp   |
| c.5468-10C>A        | p.Gly2044Ala   |
| c.67+8C>A           | p.Gly267Glu    |
| duplicazioneesone 3 | p.His1966Arg   |
| c.135-3T>C          | p.Ile1237Met;  |
|                     | p.Ile1244Thr   |
|                     | p.Ile1298Met   |
|                     | p.Ile982Leu    |

p.Leu914Phe  
 p.Lys2013Glu  
 p.Phe376Cys  
 p.Phe590Cys  
 p.Pro2589His  
 p.Pro2796Ser  
 p.Pro3194Gln  
 p.Ser1328Thr  
 p.Ser1468Thr  
 p.Ser1750Phe  
 p.Ser286Pro  
 p.Ser3366Asnfs\*4  
 p.Thr1887Met  
 p.Thr200Ile  
 p.Thr2097Met  
 p.Thr2222Cys  
 p.Thr3288Ile  
 p.Thr64Ile  
 p.Tyr2624Cys  
 p.Val1810Ile  
 c.7435+6G>A  
 c.7805+6C>T  
 c.9502-12T>G  
 c.4211G>C  
 p.Ala1615Thr  
 p.Ala1615Thr  
 p.Arg278His

**Table S2.** Non coding PVs and Large Genomic Rearrangements (LGR).

| <b>BRCA1 non-coding PVs and LGRs</b> | <b><i>n</i></b> |
|--------------------------------------|-----------------|
| c.212+2T>A                           | 2               |
| c.547+2T>A                           | 1               |
| c.5153-1G>A                          | 4               |
| c.5278-2delA                         | 2               |
| exons 1-2 deletion                   | 3               |
| exons 1-12 deletion                  | 2               |
| exons 1-13 deletion                  | 1               |
| exons 1-20 deletion                  | 1               |
| promoter and exons 1-11 deletion     | 1               |
| exon 7 deletion                      | 1               |
| exon 8 deletion                      | 2               |
| exon 19 deletion                     | 1               |
| exons 5-8 deletion                   | 1               |
| <b>BRCA2 non-coding PVs and LGRs</b> | <b><i>n</i></b> |
| c.67+1G>A                            | 2               |
| c.7976+1 G>A                         | 1               |
| c.8755-1G>A                          | 12              |
| exons 1-3 deletion                   | 1               |
| exon 14 deletion                     | 1               |
